# Supplementary material for: The Influence of Individual and Contextual Factors on the Vocational Choices of Adolescents and Their Impact on Well-Being
Source: MDPI journal article supplement (doi:10.3390/bs13030233), 2023-03-07
Supplement: s1 [file s1]

Table S1. Skewness and Kurtosis values for the hypothesised predictors and outcomes (N=147)

| Variable | Skewness | Kurtosis |
|----------|----------|----------|
| MCC-C    | -.807    | -.285    |
| PCC-C    | -.729    | -.365    |
| MCC-S    | -.078    | -.832    |
| PCC-S    | -.162    | -.930    |
| WH-A     | -.705    | .311     |
| WH-P     | -.113    | -.278    |
| WH-G     | -.570    | .007     |
| AM-A     | 2.000    | 3.657    |
| AM-E     | -.284    | -.844    |
| AM-IO    | .383     | -.902    |
| AM-ID    | -1.29    | 1.037    |
| AM-II    | -.476    | -.279    |
| SM-FV    | -.84     | .843     |
| IM-FV    | -1.162   | 1.273    |
| OM-FV    | -1.195   | 1.428    |
| CM-FV    | -.815    | -.055    |
| SM-AV    | -1.167   | 1.686    |
| IM-AV    | -1.775   | 3.378    |
| OM-AV    | -1.1     | .690     |
| CM-AV    | -.852    | .276     |
| INT-UN   | -1.635   | 2.634    |
| I WB     | -.740    | 0.023    |
| C WB     | -.974    | 1.493    |
| O WB     | -1.786   | 3.066    |
| PH WB    | -.953    | .650     |
| PS WB    | -.849    | .665     |
| E WB     | -1.029   | 1.633    |
| OV WB    | -1.378   | 2.742    |
